# Supplementary material for: Preprogrammed capillarity to passively control system-level sequential and parallel microfluidic flows
Source: Royal Society of Chemistry journal article supplement (doi:10.1039/c3lc50187f), 2013-01-01
Supplement: c3lc50187f.pdf [file c3lc50187f.pdf]

Electronic Supplementary Information For

**Preprogrammed capillarity to passively control system-level sequential and parallel microfluidic flows**

Sung-Jin Kim, Sophie Paczesny, Shuichi Takayama, Katsuo Kurabayashi

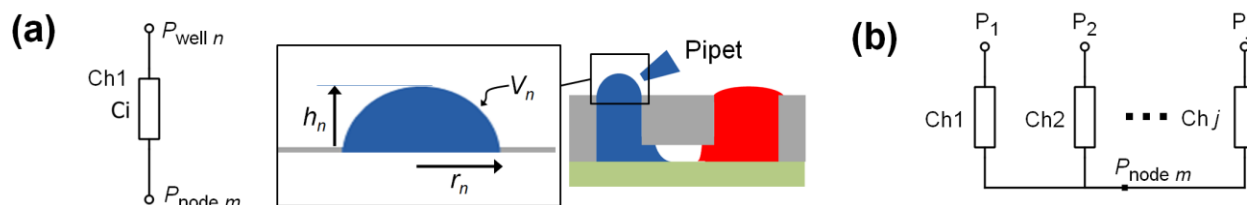

**Fig. S1.** (a) Diagram showing  $P_{\text{well } n}$  and node pressure ( $P_{\text{node } m}$ ). The difference between  $P_{\text{well } n}$  and  $P_{\text{node } m}$  drives a flow. The node-to-well volume flow rate  $Q_{\text{node} \rightarrow \text{well}} = C_i (P_{\text{node } m} - P_{\text{well } n})$  is equal to the increasing rate of the liquid drop volume  $\frac{dV_n}{dt} = \frac{\pi(r_n^2 + h_n^2)}{2} \frac{dh_n}{dt}$ , where  $V_n$  is the volume of the convex drop in the well  $n$ , and  $r_n$  and  $h_n$  are the well radius and the drop height, respectively. Thus,  $\frac{dh_n}{dt} = \frac{2C_i(P_{\text{node } m} - P_{\text{well } n})}{\pi(r_n^2 + h_n^2)}$ .  $P_{\text{well } n}$  is determined by the drop shape as  $P_{\text{well } n} = \frac{4\sigma h_n}{h_n^2 + r_n^2}$ , where  $\sigma$  is the surface tension of the drop. (b) Diagram for  $P_{\text{node } m}$ . Analogous to Kirchhoff's current law, the sum of the volume flow rates coming into node  $m$  is 0. That is,  $\sum_{i=1}^j C_i (P_{\text{node } m} - P_i) = 0$ , where  $P_i$  is either well or another node pressure. Thus,  $P_{\text{node } m}$  is  $\frac{\sum_{i=1}^j C_i P_i}{\sum_{i=1}^j C_i}$ . The two types of equations for  $\frac{dh_n}{dt}$  and  $P_{\text{node } m}$  constitute simultaneous differential equations of the entire fluidic network, and they are solved numerically (MATLAB, Mathworks).

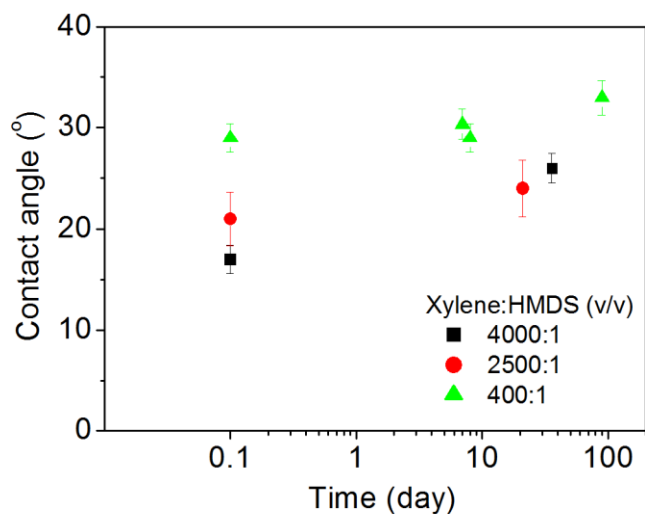

**Fig. S2.** Adjustment of contact angle for the device bottom layer. The contact angle was measured on surface-treated silicon for phosphate buffered saline (PBS) solution. The results show that the surface coated with the xylene-to-HMDS ratio of 400:1 was hydrophilically stable and maintained an appropriate contact angle value, which did not result in the edge wetting of a channel cross-section. Thus, we used the surface for the device.

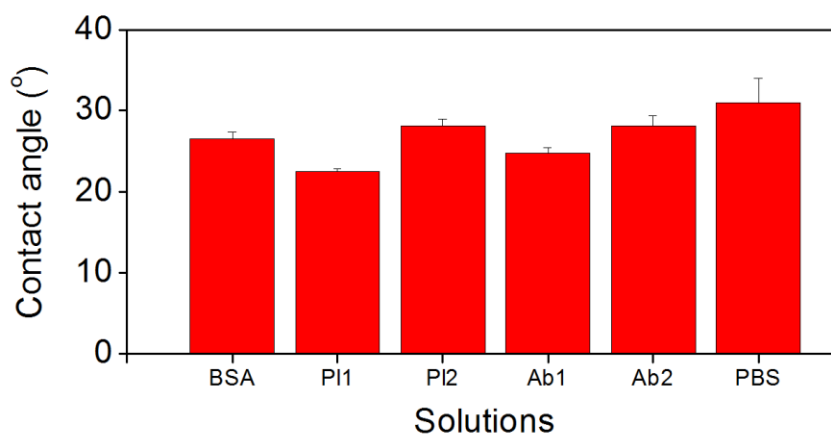

**Figure S3.** Contact angles of various immunoassay solutions on a stable hydrophilic surface (xylene : HMDS = 400:1). Each solution was measured in triplicate. PI1 and PI2 were human plasmas from different donors. Ab1 and Ab2 are 6.7  $\mu$ M C-reactive protein (CRP) antibody and 600 nM FITC-labeled CRP antibody (Bethyl Laboratory), respectively

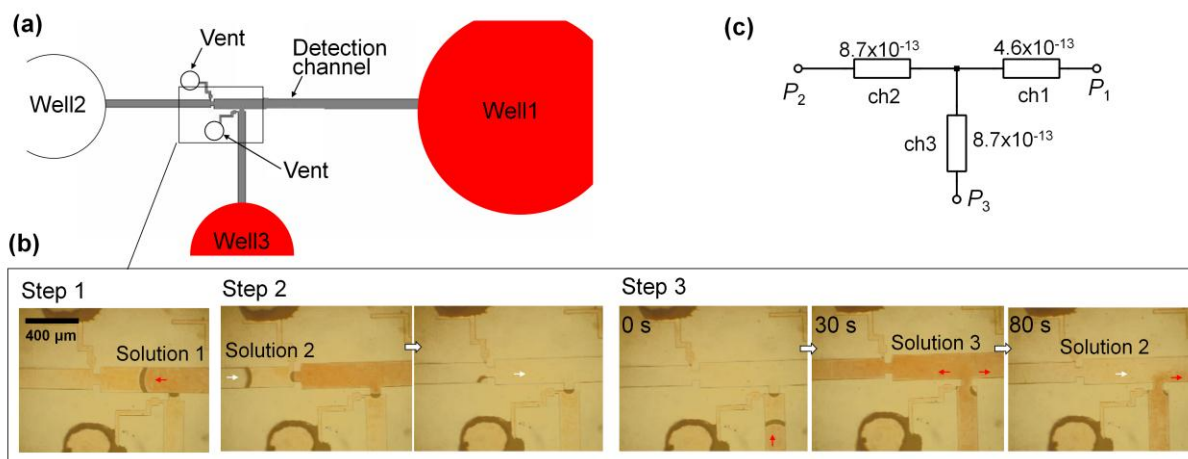

**Fig. S4.** Disturbance of sequential flows. (a) Schematic of 3-well system. (b) Photographs of sequential flows. Solutions 1, 2, and 3 were sequentially dispensed in wells 1, 2, and 3, respectively, and their initial well pressures ( $P_1$ ,  $P_2$ , and  $P_3$ ) were 7, 127 and 127 Pa, respectively. In step 3, solution 3 was dispensed in well 3 after  $P_1$  and  $P_2$  equilibrated. Note that solution 2 reflowed in step 3. (c) Fluidic circuit diagram of step 3 of (b). Each channel's (ch  $i$ ) fluidic conductance (unit:  $\text{m}^5 \text{N}^{-1} \text{s}^{-1}$ ) is shown in the diagram.

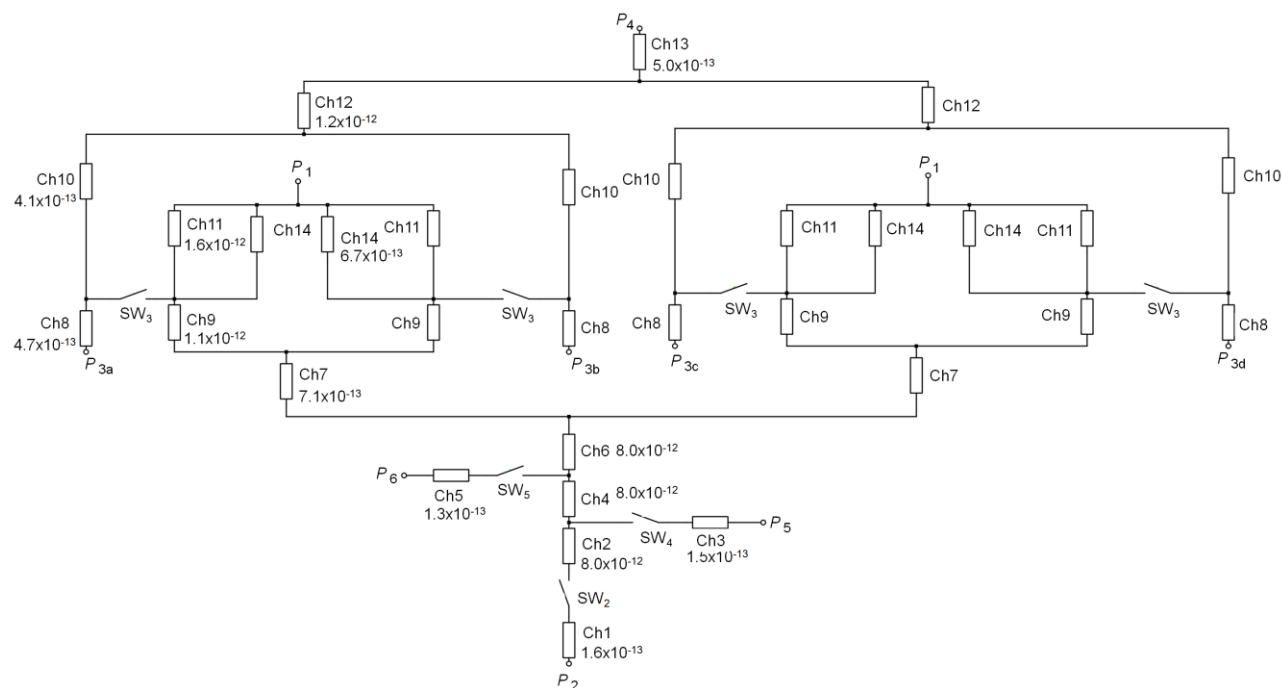

**Fig. S5.** Microfluidic circuit diagram showing entire fluidic network. The model includes well pressures ( $P_i$ ) and fluidic channels (Ch  $i$ ). Each channel's fluidic conductance (unit:  $\text{m}^5 \text{N}^{-1} \text{s}^{-1}$ ), which is

the inverse of fluidic resistance, is noted in the diagram. In the  $k$ th step, a solution in an inlet well starts to flow upon turning on the corresponding switch ( $SW_k$ ) by a timing channel.
